# Supplementary material for: Effects of minimally invasive and traditional surgeries on the quality of life of children with congenital heart disease: a retrospective propensity score-matched study
Source: Springer Nature journal article supplement (doi:10.1186/s12887-021-02978-5), 2021-11-24

|             |
|-------------|
| ID# _____   |
| Date: _____ |

# PedsQL™

## Cardiac Module

Version 3.0

### YOUNG CHILD REPORT (ages 5-7)

Instructions for interviewer:

***I am going to ask you some questions about things that might be a problem for some children. I want to know how much of a problem any of these things might be for you.***

Show the child the template and point to the responses as you read.

***If it is not at all a problem for you, point to the smiling face***

***If it is sometimes a problem for you, point to the middle face***

***If it is a problem for you a lot, point to the frowning face***

***I will read each question. Point to the pictures to show me how much of a problem it is for you. Let's try a practice one first.***

|                                         | Not at all                                                                          | Sometimes                                                                             | A lot                                                                                 |
|-----------------------------------------|-------------------------------------------------------------------------------------|---------------------------------------------------------------------------------------|---------------------------------------------------------------------------------------|
| Is it hard for you to snap your fingers |  |  |  |

Ask the child to demonstrate snapping his or her fingers to determine whether or not the question was answered correctly. Repeat the question if the child demonstrates a response that is different from his or her action.

**Think about how you have been doing for the last few weeks. Please listen carefully to each sentence and tell me how much of a problem this is for you.**

After reading the item, gesture to the template. If the child hesitates or does not seem to understand how to answer, read the response options while pointing at the faces.

| <b>HEART PROBLEMS AND TREATMENT</b><br><i>(problems with...)</i>         | <b>Not at all</b> | <b>Some-times</b> | <b>A lot</b> |
|--------------------------------------------------------------------------|-------------------|-------------------|--------------|
| 1. Is it hard for you to breathe when you do sports activity or exercise | 0                 | 2                 | 4            |
| 2. Does your chest hurt when you do sports activity or exercise          | 0                 | 2                 | 4            |
| 3. Do you catch colds more than other kids                               | 0                 | 2                 | 4            |
| 4. Do you feel your heart beating fast                                   | 0                 | 2                 | 4            |
| 5. Do others tell you that your lips turn blue when you run              | 0                 | 2                 | 4            |
| 6. Do you wake up at night with trouble breathing                        | 0                 | 2                 | 4            |
| 7. Do you have to rest more than your friends                            | 0                 | 2                 | 4            |

**If you are currently taking heart medicine, please answer the following... Otherwise, please skip to “Perceived Physical Appearance”.**

| <b>TREATMENT II</b> <i>(problems with...)</i>         | <b>Not at all</b> | <b>Some-times</b> | <b>A lot</b> |
|-------------------------------------------------------|-------------------|-------------------|--------------|
| 1. Do you say no to taking your heart medicine        | 0                 | 2                 | 4            |
| 2. Do you have a hard time taking your heart medicine | 0                 | 2                 | 4            |
| 3. Does your heart medicine make you feel sick        | 0                 | 2                 | 4            |

| <b>PERCEIVED PHYSICAL APPEARANCE</b> <i>(problems with...)</i> | <b>Not at all</b> | <b>Some-times</b> | <b>A lot</b> |
|----------------------------------------------------------------|-------------------|-------------------|--------------|
| 1. Do you feel you don't look good                             | 0                 | 2                 | 4            |
| 2. Do you not like other people to see your scars              | 0                 | 2                 | 4            |
| 3. Do other kids tease you when they see your scars            | 0                 | 2                 | 4            |

| <b>TREATMENT ANXIETY</b> <i>(problems with...)</i>          | <b>Not at all</b> | <b>Some-times</b> | <b>A lot</b> |
|-------------------------------------------------------------|-------------------|-------------------|--------------|
| 1. Do you get scared when you are waiting to see the doctor | 0                 | 2                 | 4            |
| 2. Do you get scared when you have to go to the doctor      | 0                 | 2                 | 4            |
| 3. Do you get scared when you have to go to the hospital    | 0                 | 2                 | 4            |
| 4. Do you get scared when you have to have heart tests      | 0                 | 2                 | 4            |

**Think about how you have been doing for the last few weeks. Please listen carefully to each sentence and tell me how much of a problem this is for you.**

| <b>COGNITIVE PROBLEMS (problems with...)</b>                        | <b>Not at all</b> | <b>Some-times</b> | <b>A lot</b> |
|---------------------------------------------------------------------|-------------------|-------------------|--------------|
| 1. Is it hard for you to know what to do when something bothers you | 0                 | 2                 | 4            |
| 2. Do you have trouble with numbers or math worksheets              | 0                 | 2                 | 4            |
| 3. Do you have trouble writing letters or words                     | 0                 | 2                 | 4            |
| 4. Is it hard for you to listen to the teacher                      | 0                 | 2                 | 4            |
| 5. Is it hard for you to remember what is read to you               | 0                 | 2                 | 4            |

| <b>COMMUNICATION (problems with...)</b>                             | <b>Not at all</b> | <b>Some-times</b> | <b>A lot</b> |
|---------------------------------------------------------------------|-------------------|-------------------|--------------|
| 1. Is it hard for you to tell the doctors and nurses how you feel   | 0                 | 2                 | 4            |
| 2. Is it hard for you to ask the doctors and nurses questions       | 0                 | 2                 | 4            |
| 3. Is it hard for you to explain your heart problem to other people | 0                 | 2                 | 4            |

# How much of a problem is this for you?

Not at all

Sometimes

A lot

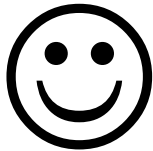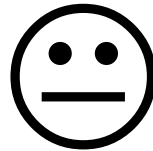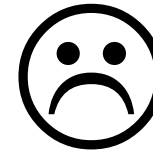

Supplement: MOESM7 [file 19897580]
