# Supplementary material for: Effects of minimally invasive and traditional surgeries on the quality of life of children with congenital heart disease: a retrospective propensity score-matched study
Source: Springer Nature journal article supplement (doi:10.1186/s12887-021-02978-5), 2021-11-24
Supplement: MOESM1 [file 19897580]

ID#: \_\_\_\_\_

Date: \_\_\_\_\_

# PedsQL™

## Cardiac Module

Version 3.0

### PARENT REPORT for ADULTS

#### DIRECTIONS

Adults with heart conditions sometimes have special problems. On the following page is a list of things that might be a problem for **your child**. Please tell us **how much of a problem** each one has been for **your child** during the **past ONE month** by circling:

- 0 if it is **never** a problem
- 1 if it is **almost never** a problem
- 2 if it is **sometimes** a problem
- 3 if it is **often** a problem
- 4 if it is **almost always** a problem

There are no right or wrong answers.  
If you do not understand a question, please ask for help.

In the past **ONE month**, how much of a **problem** has your child had with ...

| <b>HEART PROBLEMS AND TREATMENT</b><br><i>(problems with...)</i>   | Never | Almost Never | Some-times | Often | Almost Always |
|--------------------------------------------------------------------|-------|--------------|------------|-------|---------------|
| 1. Getting out of breath while doing sports activity or exercise   | 0     | 1            | 2          | 3     | 4             |
| 2. Chest pain or tightness while doing sports activity or exercise | 0     | 1            | 2          | 3     | 4             |
| 3. Catching colds easily                                           | 0     | 1            | 2          | 3     | 4             |
| 4. Fast heartbeat                                                  | 0     | 1            | 2          | 3     | 4             |
| 5. His/her lips turning blue when running                          | 0     | 1            | 2          | 3     | 4             |
| 6. Waking up at night with trouble breathing                       | 0     | 1            | 2          | 3     | 4             |
| 7. Having to rest more than his/her friends                        | 0     | 1            | 2          | 3     | 4             |

If your child is currently taking heart medicine, please answer the following...  
Otherwise, please skip to "Perceived Physical Appearance".

| <b>TREATMENT II</b> <i>(problems with...)</i>     | Never | Almost Never | Some-times | Often | Almost Always |
|---------------------------------------------------|-------|--------------|------------|-------|---------------|
| 1. Refusing to take heart medicine                | 0     | 1            | 2          | 3     | 4             |
| 2. Difficulty taking heart medicine               | 0     | 1            | 2          | 3     | 4             |
| 3. Forgetting to take heart medicine              | 0     | 1            | 2          | 3     | 4             |
| 4. Heart medicine making him/her feel sick        | 0     | 1            | 2          | 3     | 4             |
| 5. Worry about side effects from his/her medicine | 0     | 1            | 2          | 3     | 4             |

| <b>PERCEIVED PHYSICAL APPEARANCE</b><br><i>(problems with...)</i> | Never | Almost Never | Some-times | Often | Almost Always |
|-------------------------------------------------------------------|-------|--------------|------------|-------|---------------|
| 1. Feeling that he/she is not good looking                        | 0     | 1            | 2          | 3     | 4             |
| 2. Not liking other people to see his/her scars                   | 0     | 1            | 2          | 3     | 4             |
| 3. Being embarrassed about others seeing his/her body             | 0     | 1            | 2          | 3     | 4             |

| <b>TREATMENT ANXIETY</b> <i>(problems with...)</i>            | Never | Almost Never | Some-times | Often | Almost Always |
|---------------------------------------------------------------|-------|--------------|------------|-------|---------------|
| 1. Getting anxious when waiting to see the doctor             | 0     | 1            | 2          | 3     | 4             |
| 2. Getting anxious about going to the doctor                  | 0     | 1            | 2          | 3     | 4             |
| 3. Getting anxious about going to the hospital                | 0     | 1            | 2          | 3     | 4             |
| 4. Getting anxious when he/she has to have medical treatments | 0     | 1            | 2          | 3     | 4             |

In the past **ONE month**, how much of a **problem** has your child had with ...

| <b>COGNITIVE PROBLEMS (problems with...)</b>              | <b>Never</b> | <b>Almost Never</b> | <b>Some-times</b> | <b>Often</b> | <b>Almost Always</b> |
|-----------------------------------------------------------|--------------|---------------------|-------------------|--------------|----------------------|
| 1. Figuring out what to do when something bothers him/her | 0            | 1                   | 2                 | 3            | 4                    |
| 2. Trouble solving math problems                          | 0            | 1                   | 2                 | 3            | 4                    |
| 3. Trouble writing papers or reports                      | 0            | 1                   | 2                 | 3            | 4                    |
| 4. Difficulty paying attention to things                  | 0            | 1                   | 2                 | 3            | 4                    |
| 5. Remembering what he/she reads                          | 0            | 1                   | 2                 | 3            | 4                    |

| <b>COMMUNICATION (problems with...)</b>             | <b>Never</b> | <b>Almost Never</b> | <b>Some-times</b> | <b>Often</b> | <b>Almost Always</b> |
|-----------------------------------------------------|--------------|---------------------|-------------------|--------------|----------------------|
| 1. Telling the doctors and nurses how he/she feels  | 0            | 1                   | 2                 | 3            | 4                    |
| 2. Asking the doctors or nurses questions           | 0            | 1                   | 2                 | 3            | 4                    |
| 3. Explaining his/her heart problem to other people | 0            | 1                   | 2                 | 3            | 4                    |
