# Supplementary material for: Effects of minimally invasive and traditional surgeries on the quality of life of children with congenital heart disease: a retrospective propensity score-matched study
Source: Springer Nature journal article supplement (doi:10.1186/s12887-021-02978-5), 2021-11-24
Supplement: MOESM6 [file 19897580]

ID#: \_\_\_\_\_

Date: \_\_\_\_\_

# PedsQL™

## Cardiac Module

Version 3.0

### YOUNG ADULT REPORT (ages 18-25)

#### DIRECTIONS

Young Adults with heart conditions sometimes have special problems. Please tell us **how much of a problem** each one has been for you during the **past ONE month** by circling:

- 0** if it is **never** a problem
- 1** if it is **almost never** a problem
- 2** if it is **sometimes** a problem
- 3** if it is **often** a problem
- 4** if it is **almost always** a problem

There are no right or wrong answers.  
If you do not understand a question, please ask for help.

In the past **ONE** month, how much of a **problem** has this been for you...

| <b>HEART PROBLEMS AND TREATMENT</b><br><i>(problems with...)</i>       | Never | Almost<br>Never | Some-<br>times | Often | Almost<br>Always |
|------------------------------------------------------------------------|-------|-----------------|----------------|-------|------------------|
| 1. I get out of breath when I do sports activity or exercise           | 0     | 1               | 2              | 3     | 4                |
| 2. My chest hurts or feels tight when I do sports activity or exercise | 0     | 1               | 2              | 3     | 4                |
| 3. I catch colds easily                                                | 0     | 1               | 2              | 3     | 4                |
| 4. I feel my heart beating fast                                        | 0     | 1               | 2              | 3     | 4                |
| 5. My lips turn blue when I run                                        | 0     | 1               | 2              | 3     | 4                |
| 6. I wake up at night with trouble breathing                           | 0     | 1               | 2              | 3     | 4                |
| 7. I have to rest more than my friends                                 | 0     | 1               | 2              | 3     | 4                |

If you are currently taking heart medicine, please answer the following...  
Otherwise, please skip to “Perceived Physical Appearance”.

| <b>TREATMENT II</b> <i>(problems with...)</i>    | Never | Almost<br>Never | Some-<br>times | Often | Almost<br>Always |
|--------------------------------------------------|-------|-----------------|----------------|-------|------------------|
| 1. I refuse to take my heart medicine            | 0     | 1               | 2              | 3     | 4                |
| 2. It is hard for me to take my heart medicine   | 0     | 1               | 2              | 3     | 4                |
| 3. I forget to take my heart medicine            | 0     | 1               | 2              | 3     | 4                |
| 4. My heart medicine makes me feel sick          | 0     | 1               | 2              | 3     | 4                |
| 5. I worry about how my medicines affect my body | 0     | 1               | 2              | 3     | 4                |

| <b>PERCEIVED PHYSICAL APPEARANCE</b><br><i>(problems with...)</i> | Never | Almost<br>Never | Some-<br>times | Often | Almost<br>Always |
|-------------------------------------------------------------------|-------|-----------------|----------------|-------|------------------|
| 1. I feel I am not good looking                                   | 0     | 1               | 2              | 3     | 4                |
| 2. I don't like other people to see my scars                      | 0     | 1               | 2              | 3     | 4                |
| 3. I am embarrassed when others see my body                       | 0     | 1               | 2              | 3     | 4                |

| <b>TREATMENT ANXIETY</b> <i>(problems with...)</i>     | Never | Almost<br>Never | Some-<br>times | Often | Almost<br>Always |
|--------------------------------------------------------|-------|-----------------|----------------|-------|------------------|
| 1. I get scared when I am waiting to see the doctor    | 0     | 1               | 2              | 3     | 4                |
| 2. I get scared when I have to go to the doctor        | 0     | 1               | 2              | 3     | 4                |
| 3. I get scared when I have to go to the hospital      | 0     | 1               | 2              | 3     | 4                |
| 4. I get scared when I have to have medical treatments | 0     | 1               | 2              | 3     | 4                |

In the past **ONE** month, how much of a **problem** has this been for you...

| <b>COGNITIVE PROBLEMS (problems with...)</b>                            | <b>Never</b> | <b>Almost<br/>Never</b> | <b>Some-<br/>times</b> | <b>Often</b> | <b>Almost<br/>Always</b> |
|-------------------------------------------------------------------------|--------------|-------------------------|------------------------|--------------|--------------------------|
| 1. It is hard for me to figure out what to do when something bothers me | 0            | 1                       | 2                      | 3            | 4                        |
| 2. I have trouble solving math problems                                 | 0            | 1                       | 2                      | 3            | 4                        |
| 3. I have trouble writing papers or reports                             | 0            | 1                       | 2                      | 3            | 4                        |
| 4. It is hard for me to pay attention to things                         | 0            | 1                       | 2                      | 3            | 4                        |
| 5. It is hard for me to remember what I read                            | 0            | 1                       | 2                      | 3            | 4                        |

| <b>COMMUNICATION (problems with...)</b>                          | <b>Never</b> | <b>Almost<br/>Never</b> | <b>Some-<br/>times</b> | <b>Often</b> | <b>Almost<br/>Always</b> |
|------------------------------------------------------------------|--------------|-------------------------|------------------------|--------------|--------------------------|
| 1. It is hard for me to tell the doctors and nurses how I feel   | 0            | 1                       | 2                      | 3            | 4                        |
| 2. It is hard for me to ask the doctors and nurses questions     | 0            | 1                       | 2                      | 3            | 4                        |
| 3. It is hard for me to explain my heart problem to other people | 0            | 1                       | 2                      | 3            | 4                        |
