# Supplementary material for: Effects of minimally invasive and traditional surgeries on the quality of life of children with congenital heart disease: a retrospective propensity score-matched study
Source: Springer Nature journal article supplement (doi:10.1186/s12887-021-02978-5), 2021-11-24
Supplement: MOESM11 [file 19897580]

ID#: \_\_\_\_\_

Date: \_\_\_\_\_

# PedsQL™

## Cardiac Module

Version 3.0

### ADULT REPORT

#### DIRECTIONS

Adults with heart conditions sometimes have special problems. Please tell us **how much of a problem** each one has been for you during the **past ONE month** by circling:

- 0 if it is **never** a problem
- 1 if it is **almost never** a problem
- 2 if it is **sometimes** a problem
- 3 if it is **often** a problem
- 4 if it is **almost always** a problem

There are no right or wrong answers.  
If you do not understand a question, please ask for help.

In the past **ONE** month, how much of a **problem** has this been for you...

| <b>HEART PROBLEMS AND TREATMENT</b><br><i>(problems with...)</i>       | Never | Almost<br>Never | Some-<br>times | Often | Almost<br>Always |
|------------------------------------------------------------------------|-------|-----------------|----------------|-------|------------------|
| 1. I get out of breath when I do sports activity or exercise           | 0     | 1               | 2              | 3     | 4                |
| 2. My chest hurts or feels tight when I do sports activity or exercise | 0     | 1               | 2              | 3     | 4                |
| 3. I catch colds easily                                                | 0     | 1               | 2              | 3     | 4                |
| 4. I feel my heart beating fast                                        | 0     | 1               | 2              | 3     | 4                |
| 5. My lips turn blue when I run                                        | 0     | 1               | 2              | 3     | 4                |
| 6. I wake up at night with trouble breathing                           | 0     | 1               | 2              | 3     | 4                |
| 7. I have to rest more than my friends                                 | 0     | 1               | 2              | 3     | 4                |

If you are currently taking heart medicine, please answer the following...  
Otherwise, please skip to "Perceived Physical Appearance".

| <b>TREATMENT II</b> <i>(problems with...)</i>    | Never | Almost<br>Never | Some-<br>times | Often | Almost<br>Always |
|--------------------------------------------------|-------|-----------------|----------------|-------|------------------|
| 1. I refuse to take my heart medicine            | 0     | 1               | 2              | 3     | 4                |
| 2. It is hard for me to take my heart medicine   | 0     | 1               | 2              | 3     | 4                |
| 3. I forget to take my heart medicine            | 0     | 1               | 2              | 3     | 4                |
| 4. My heart medicine makes me feel sick          | 0     | 1               | 2              | 3     | 4                |
| 5. I worry about how my medicines affect my body | 0     | 1               | 2              | 3     | 4                |

| <b>PERCEIVED PHYSICAL APPEARANCE</b><br><i>(problems with...)</i> | Never | Almost<br>Never | Some-<br>times | Often | Almost<br>Always |
|-------------------------------------------------------------------|-------|-----------------|----------------|-------|------------------|
| 1. I feel I am not good looking                                   | 0     | 1               | 2              | 3     | 4                |
| 2. I don't like other people to see my scars                      | 0     | 1               | 2              | 3     | 4                |
| 3. I am embarrassed when others see my body                       | 0     | 1               | 2              | 3     | 4                |

| <b>TREATMENT ANXIETY</b> <i>(problems with...)</i>     | Never | Almost<br>Never | Some-<br>times | Often | Almost<br>Always |
|--------------------------------------------------------|-------|-----------------|----------------|-------|------------------|
| 1. I get scared when I am waiting to see the doctor    | 0     | 1               | 2              | 3     | 4                |
| 2. I get scared when I have to go to the doctor        | 0     | 1               | 2              | 3     | 4                |
| 3. I get scared when I have to go to the hospital      | 0     | 1               | 2              | 3     | 4                |
| 4. I get scared when I have to have medical treatments | 0     | 1               | 2              | 3     | 4                |

In the past **ONE** month, how much of a **problem** has this been for you...

| <b>COGNITIVE PROBLEMS (problems with...)</b>                            | <b>Never</b> | <b>Almost<br/>Never</b> | <b>Some-<br/>times</b> | <b>Often</b> | <b>Almost<br/>Always</b> |
|-------------------------------------------------------------------------|--------------|-------------------------|------------------------|--------------|--------------------------|
| 1. It is hard for me to figure out what to do when something bothers me | 0            | 1                       | 2                      | 3            | 4                        |
| 2. I have trouble solving math problems                                 | 0            | 1                       | 2                      | 3            | 4                        |
| 3. I have trouble writing papers or reports                             | 0            | 1                       | 2                      | 3            | 4                        |
| 4. It is hard for me to pay attention to things                         | 0            | 1                       | 2                      | 3            | 4                        |
| 5. It is hard for me to remember what I read                            | 0            | 1                       | 2                      | 3            | 4                        |

| <b>COMMUNICATION (problems with...)</b>                          | <b>Never</b> | <b>Almost<br/>Never</b> | <b>Some-<br/>times</b> | <b>Often</b> | <b>Almost<br/>Always</b> |
|------------------------------------------------------------------|--------------|-------------------------|------------------------|--------------|--------------------------|
| 1. It is hard for me to tell the doctors and nurses how I feel   | 0            | 1                       | 2                      | 3            | 4                        |
| 2. It is hard for me to ask the doctors and nurses questions     | 0            | 1                       | 2                      | 3            | 4                        |
| 3. It is hard for me to explain my heart problem to other people | 0            | 1                       | 2                      | 3            | 4                        |

ID#: \_\_\_\_\_

Date: \_\_\_\_\_

# PedsQL™

## Cardiac Module

Version 3.0

### YOUNG ADULT REPORT (ages 18-25)

#### DIRECTIONS

Young Adults with heart conditions sometimes have special problems. Please tell us **how much of a problem** each one has been for you during the **past ONE month** by circling:

- 0** if it is **never** a problem
- 1** if it is **almost never** a problem
- 2** if it is **sometimes** a problem
- 3** if it is **often** a problem
- 4** if it is **almost always** a problem

There are no right or wrong answers.  
If you do not understand a question, please ask for help.

In the past **ONE** month, how much of a **problem** has this been for you...

| <b>HEART PROBLEMS AND TREATMENT</b><br><i>(problems with...)</i>       | Never | Almost<br>Never | Some-<br>times | Often | Almost<br>Always |
|------------------------------------------------------------------------|-------|-----------------|----------------|-------|------------------|
| 1. I get out of breath when I do sports activity or exercise           | 0     | 1               | 2              | 3     | 4                |
| 2. My chest hurts or feels tight when I do sports activity or exercise | 0     | 1               | 2              | 3     | 4                |
| 3. I catch colds easily                                                | 0     | 1               | 2              | 3     | 4                |
| 4. I feel my heart beating fast                                        | 0     | 1               | 2              | 3     | 4                |
| 5. My lips turn blue when I run                                        | 0     | 1               | 2              | 3     | 4                |
| 6. I wake up at night with trouble breathing                           | 0     | 1               | 2              | 3     | 4                |
| 7. I have to rest more than my friends                                 | 0     | 1               | 2              | 3     | 4                |

If you are currently taking heart medicine, please answer the following...  
Otherwise, please skip to “Perceived Physical Appearance”.

| <b>TREATMENT II</b> <i>(problems with...)</i>    | Never | Almost<br>Never | Some-<br>times | Often | Almost<br>Always |
|--------------------------------------------------|-------|-----------------|----------------|-------|------------------|
| 1. I refuse to take my heart medicine            | 0     | 1               | 2              | 3     | 4                |
| 2. It is hard for me to take my heart medicine   | 0     | 1               | 2              | 3     | 4                |
| 3. I forget to take my heart medicine            | 0     | 1               | 2              | 3     | 4                |
| 4. My heart medicine makes me feel sick          | 0     | 1               | 2              | 3     | 4                |
| 5. I worry about how my medicines affect my body | 0     | 1               | 2              | 3     | 4                |

| <b>PERCEIVED PHYSICAL APPEARANCE</b><br><i>(problems with...)</i> | Never | Almost<br>Never | Some-<br>times | Often | Almost<br>Always |
|-------------------------------------------------------------------|-------|-----------------|----------------|-------|------------------|
| 1. I feel I am not good looking                                   | 0     | 1               | 2              | 3     | 4                |
| 2. I don't like other people to see my scars                      | 0     | 1               | 2              | 3     | 4                |
| 3. I am embarrassed when others see my body                       | 0     | 1               | 2              | 3     | 4                |

| <b>TREATMENT ANXIETY</b> <i>(problems with...)</i>     | Never | Almost<br>Never | Some-<br>times | Often | Almost<br>Always |
|--------------------------------------------------------|-------|-----------------|----------------|-------|------------------|
| 1. I get scared when I am waiting to see the doctor    | 0     | 1               | 2              | 3     | 4                |
| 2. I get scared when I have to go to the doctor        | 0     | 1               | 2              | 3     | 4                |
| 3. I get scared when I have to go to the hospital      | 0     | 1               | 2              | 3     | 4                |
| 4. I get scared when I have to have medical treatments | 0     | 1               | 2              | 3     | 4                |

In the past **ONE** month, how much of a **problem** has this been for you...

| <b>COGNITIVE PROBLEMS (problems with...)</b>                            | <b>Never</b> | <b>Almost Never</b> | <b>Some-times</b> | <b>Often</b> | <b>Almost Always</b> |
|-------------------------------------------------------------------------|--------------|---------------------|-------------------|--------------|----------------------|
| 1. It is hard for me to figure out what to do when something bothers me | 0            | 1                   | 2                 | 3            | 4                    |
| 2. I have trouble solving math problems                                 | 0            | 1                   | 2                 | 3            | 4                    |
| 3. I have trouble writing papers or reports                             | 0            | 1                   | 2                 | 3            | 4                    |
| 4. It is hard for me to pay attention to things                         | 0            | 1                   | 2                 | 3            | 4                    |
| 5. It is hard for me to remember what I read                            | 0            | 1                   | 2                 | 3            | 4                    |

| <b>COMMUNICATION (problems with...)</b>                          | <b>Never</b> | <b>Almost Never</b> | <b>Some-times</b> | <b>Often</b> | <b>Almost Always</b> |
|------------------------------------------------------------------|--------------|---------------------|-------------------|--------------|----------------------|
| 1. It is hard for me to tell the doctors and nurses how I feel   | 0            | 1                   | 2                 | 3            | 4                    |
| 2. It is hard for me to ask the doctors and nurses questions     | 0            | 1                   | 2                 | 3            | 4                    |
| 3. It is hard for me to explain my heart problem to other people | 0            | 1                   | 2                 | 3            | 4                    |

ID#: \_\_\_\_\_

Date: \_\_\_\_\_

# PedsQL™

## Cardiac Module

Version 3.0

### PARENT REPORT for YOUNG ADULTS (ages 18-25)

#### DIRECTIONS

Young Adults with heart conditions sometimes have special problems. On the following page is a list of things that might be a problem for **your child**. Please tell us **how much of a problem** each one has been for **your child** during the **past ONE month** by circling:

- 0** if it is **never** a problem
- 1** if it is **almost never** a problem
- 2** if it is **sometimes** a problem
- 3** if it is **often** a problem
- 4** if it is **almost always** a problem

There are no right or wrong answers.  
If you do not understand a question, please ask for help.

In the past **ONE month**, how much of a **problem** has your child had with ...

| <b>HEART PROBLEMS AND TREATMENT</b><br><i>(problems with...)</i>   | Never | Almost<br>Never | Some-<br>times | Often | Almost<br>Always |
|--------------------------------------------------------------------|-------|-----------------|----------------|-------|------------------|
| 1. Getting out of breath while doing sports activity or exercise   | 0     | 1               | 2              | 3     | 4                |
| 2. Chest pain or tightness while doing sports activity or exercise | 0     | 1               | 2              | 3     | 4                |
| 3. Catching colds easily                                           | 0     | 1               | 2              | 3     | 4                |
| 4. Fast heartbeat                                                  | 0     | 1               | 2              | 3     | 4                |
| 5. His/her lips turning blue when running                          | 0     | 1               | 2              | 3     | 4                |
| 6. Waking up at night with trouble breathing                       | 0     | 1               | 2              | 3     | 4                |
| 7. Having to rest more than his/her friends                        | 0     | 1               | 2              | 3     | 4                |

If your child is currently taking heart medicine, please answer the following...  
Otherwise, please skip to "Perceived Physical Appearance".

| <b>TREATMENT II</b> <i>(problems with...)</i>     | Never | Almost<br>Never | Some-<br>times | Often | Almost<br>Always |
|---------------------------------------------------|-------|-----------------|----------------|-------|------------------|
| 1. Refusing to take heart medicine                | 0     | 1               | 2              | 3     | 4                |
| 2. Difficulty taking heart medicine               | 0     | 1               | 2              | 3     | 4                |
| 3. Forgetting to take heart medicine              | 0     | 1               | 2              | 3     | 4                |
| 4. Heart medicine making him/her feel sick        | 0     | 1               | 2              | 3     | 4                |
| 5. Worry about side effects from his/her medicine | 0     | 1               | 2              | 3     | 4                |

| <b>PERCEIVED PHYSICAL APPEARANCE</b><br><i>(problems with...)</i> | Never | Almost<br>Never | Some-<br>times | Often | Almost<br>Always |
|-------------------------------------------------------------------|-------|-----------------|----------------|-------|------------------|
| 1. Feeling that he/she is not good looking                        | 0     | 1               | 2              | 3     | 4                |
| 2. Not liking other people to see his/her scars                   | 0     | 1               | 2              | 3     | 4                |
| 3. Being embarrassed about others seeing his/her body             | 0     | 1               | 2              | 3     | 4                |

| <b>TREATMENT ANXIETY</b> <i>(problems with...)</i>            | Never | Almost<br>Never | Some-<br>times | Often | Almost<br>Always |
|---------------------------------------------------------------|-------|-----------------|----------------|-------|------------------|
| 1. Getting anxious when waiting to see the doctor             | 0     | 1               | 2              | 3     | 4                |
| 2. Getting anxious about going to the doctor                  | 0     | 1               | 2              | 3     | 4                |
| 3. Getting anxious about going to the hospital                | 0     | 1               | 2              | 3     | 4                |
| 4. Getting anxious when he/she has to have medical treatments | 0     | 1               | 2              | 3     | 4                |



In the past **ONE month**, how much of a **problem** has your child had with ...

| <b>COGNITIVE PROBLEMS (problems with...)</b>              | <b>Never</b> | <b>Almost Never</b> | <b>Some-times</b> | <b>Often</b> | <b>Almost Always</b> |
|-----------------------------------------------------------|--------------|---------------------|-------------------|--------------|----------------------|
| 1. Figuring out what to do when something bothers him/her | 0            | 1                   | 2                 | 3            | 4                    |
| 2. Trouble solving math problems                          | 0            | 1                   | 2                 | 3            | 4                    |
| 3. Trouble writing papers or reports                      | 0            | 1                   | 2                 | 3            | 4                    |
| 4. Difficulty paying attention to things                  | 0            | 1                   | 2                 | 3            | 4                    |
| 5. Remembering what he/she reads                          | 0            | 1                   | 2                 | 3            | 4                    |

| <b>COMMUNICATION (problems with...)</b>             | <b>Never</b> | <b>Almost Never</b> | <b>Some-times</b> | <b>Often</b> | <b>Almost Always</b> |
|-----------------------------------------------------|--------------|---------------------|-------------------|--------------|----------------------|
| 1. Telling the doctors and nurses how he/she feels  | 0            | 1                   | 2                 | 3            | 4                    |
| 2. Asking the doctors or nurses questions           | 0            | 1                   | 2                 | 3            | 4                    |
| 3. Explaining his/her heart problem to other people | 0            | 1                   | 2                 | 3            | 4                    |

ID# \_\_\_\_\_

Date: \_\_\_\_\_

# PedsQL<sup>TM</sup>

## Cardiac Module

Version 3.0

### TEEN REPORT (ages 13-18)

#### DIRECTIONS

Teens with heart conditions sometimes have special problems. Please tell us **how much of a problem** each one has been for you during the **past ONE month** by circling:

- 0 if it is **never** a problem
- 1 if it is **almost never** a problem
- 2 if it is **sometimes** a problem
- 3 if it is **often** a problem
- 4 if it is **almost always** a problem

There are no right or wrong answers.  
If you do not understand a question, please ask for help.

In the past **ONE** month, how much of a **problem** has this been for you...

| <b>HEART PROBLEMS AND TREATMENT</b><br><i>(problems with...)</i>       | Never | Almost<br>Never | Some-<br>times | Often | Almost<br>Always |
|------------------------------------------------------------------------|-------|-----------------|----------------|-------|------------------|
| 1. I get out of breath when I do sports activity or exercise           | 0     | 1               | 2              | 3     | 4                |
| 2. My chest hurts or feels tight when I do sports activity or exercise | 0     | 1               | 2              | 3     | 4                |
| 3. I catch colds easily                                                | 0     | 1               | 2              | 3     | 4                |
| 4. I feel my heart beating fast                                        | 0     | 1               | 2              | 3     | 4                |
| 5. My lips turn blue when I run                                        | 0     | 1               | 2              | 3     | 4                |
| 6. I wake up at night with trouble breathing                           | 0     | 1               | 2              | 3     | 4                |
| 7. I have to rest more than my friends                                 | 0     | 1               | 2              | 3     | 4                |

If you are currently taking heart medicine, please answer the following...

Otherwise, please skip to "Perceived Physical Appearance".

| <b>TREATMENT II</b> <i>(problems with...)</i>  | Never | Almost<br>Never | Some-<br>times | Often | Almost<br>Always |
|------------------------------------------------|-------|-----------------|----------------|-------|------------------|
| 1. I refuse to take my heart medicine          | 0     | 1               | 2              | 3     | 4                |
| 2. It is hard for me to take my heart medicine | 0     | 1               | 2              | 3     | 4                |
| 3. I forget to take my heart medicine          | 0     | 1               | 2              | 3     | 4                |
| 4. My heart medicine makes me feel sick        | 0     | 1               | 2              | 3     | 4                |
| 5. I worry about side effects from my medicine | 0     | 1               | 2              | 3     | 4                |

| <b>PERCEIVED PHYSICAL APPEARANCE</b><br><i>(problems with...)</i> | Never | Almost<br>Never | Some-<br>times | Often | Almost<br>Always |
|-------------------------------------------------------------------|-------|-----------------|----------------|-------|------------------|
| 1. I feel I am not good looking                                   | 0     | 1               | 2              | 3     | 4                |
| 2. I don't like other people to see my scars                      | 0     | 1               | 2              | 3     | 4                |
| 3. I am embarrassed when others see my body                       | 0     | 1               | 2              | 3     | 4                |

| <b>TREATMENT ANXIETY</b> <i>(problems with...)</i>     | Never | Almost<br>Never | Some-<br>times | Often | Almost<br>Always |
|--------------------------------------------------------|-------|-----------------|----------------|-------|------------------|
| 1. I get scared when I am waiting to see the doctor    | 0     | 1               | 2              | 3     | 4                |
| 2. I get scared when I have to go to the doctor        | 0     | 1               | 2              | 3     | 4                |
| 3. I get scared when I have to go to the hospital      | 0     | 1               | 2              | 3     | 4                |
| 4. I get scared when I have to have medical treatments | 0     | 1               | 2              | 3     | 4                |

In the past **ONE** month, how much of a **problem** has this been for you...

| <b>COGNITIVE PROBLEMS (problems with...)</b>                            | <b>Never</b> | <b>Almost<br/>Never</b> | <b>Some-<br/>times</b> | <b>Often</b> | <b>Almost<br/>Always</b> |
|-------------------------------------------------------------------------|--------------|-------------------------|------------------------|--------------|--------------------------|
| 1. It is hard for me to figure out what to do when something bothers me | 0            | 1                       | 2                      | 3            | 4                        |
| 2. I have trouble solving math problems                                 | 0            | 1                       | 2                      | 3            | 4                        |
| 3. I have trouble writing school papers or reports                      | 0            | 1                       | 2                      | 3            | 4                        |
| 4. It is hard for me to pay attention to things                         | 0            | 1                       | 2                      | 3            | 4                        |
| 5. It is hard for me to remember what I read                            | 0            | 1                       | 2                      | 3            | 4                        |

| <b>COMMUNICATION (problems with...)</b>                          | <b>Never</b> | <b>Almost<br/>Never</b> | <b>Some-<br/>times</b> | <b>Often</b> | <b>Almost<br/>Always</b> |
|------------------------------------------------------------------|--------------|-------------------------|------------------------|--------------|--------------------------|
| 1. It is hard for me to tell the doctors and nurses how I feel   | 0            | 1                       | 2                      | 3            | 4                        |
| 2. It is hard for me to ask the doctors and nurses questions     | 0            | 1                       | 2                      | 3            | 4                        |
| 3. It is hard for me to explain my heart problem to other people | 0            | 1                       | 2                      | 3            | 4                        |

ID# \_\_\_\_\_

Date: \_\_\_\_\_

# PedsQL<sup>TM</sup>

## Cardiac Module

Version 3.0

### PARENT REPORT for TEENS (ages 13-18)

#### DIRECTIONS

Teens with heart conditions sometimes have special problems. On the following page is a list of things that might be a problem for **your teen**. Please tell us **how much of a problem** each one has been for **your teen** during the **past ONE month** by circling:

- 0** if it is **never** a problem
- 1** if it is **almost never** a problem
- 2** if it is **sometimes** a problem
- 3** if it is **often** a problem
- 4** if it is **almost always** a problem

There are no right or wrong answers.  
If you do not understand a question, please ask for help.

In the past **ONE month**, how much of a **problem** has your teen had with ...

| <b>HEART PROBLEMS AND TREATMENT</b><br><i>(problems with...)</i>   | Never | Almost Never | Some-times | Often | Almost Always |
|--------------------------------------------------------------------|-------|--------------|------------|-------|---------------|
| 1. Getting out of breath while doing sports activity or exercise   | 0     | 1            | 2          | 3     | 4             |
| 2. Chest pain or tightness while doing sports activity or exercise | 0     | 1            | 2          | 3     | 4             |
| 3. Catching colds easily                                           | 0     | 1            | 2          | 3     | 4             |
| 4. Fast heartbeat                                                  | 0     | 1            | 2          | 3     | 4             |
| 5. His/her lips turning blue when running                          | 0     | 1            | 2          | 3     | 4             |
| 6. Waking up at night with trouble breathing                       | 0     | 1            | 2          | 3     | 4             |
| 7. Having to rest more than his/her friends                        | 0     | 1            | 2          | 3     | 4             |

If your child is currently taking heart medicine, please answer the following...  
Otherwise, please skip to "Perceived Physical Appearance".

| <b>TREATMENT II</b> <i>(problems with...)</i>        | Never | Almost Never | Some-times | Often | Almost Always |
|------------------------------------------------------|-------|--------------|------------|-------|---------------|
| 1. Refusing to take heart medicine                   | 0     | 1            | 2          | 3     | 4             |
| 2. Difficulty taking heart medicine                  | 0     | 1            | 2          | 3     | 4             |
| 3. Forgetting to take heart medicine                 | 0     | 1            | 2          | 3     | 4             |
| 4. Heart medicine making him/her feel sick           | 0     | 1            | 2          | 3     | 4             |
| 5. Worrying about side effects from his/her medicine | 0     | 1            | 2          | 3     | 4             |

| <b>PERCEIVED PHYSICAL APPEARANCE</b><br><i>(problems with...)</i> | Never | Almost Never | Some-times | Often | Almost Always |
|-------------------------------------------------------------------|-------|--------------|------------|-------|---------------|
| 1. Feeling that he/she is not good looking                        | 0     | 1            | 2          | 3     | 4             |
| 2. Not liking other people to see his/her scars                   | 0     | 1            | 2          | 3     | 4             |
| 3. Being embarrassed about others seeing his/her body             | 0     | 1            | 2          | 3     | 4             |

| <b>TREATMENT ANXIETY</b> <i>(problems with...)</i>            | Never | Almost Never | Some-times | Often | Almost Always |
|---------------------------------------------------------------|-------|--------------|------------|-------|---------------|
| 1. Getting anxious when waiting to see the doctor             | 0     | 1            | 2          | 3     | 4             |
| 2. Getting anxious about going to the doctor                  | 0     | 1            | 2          | 3     | 4             |
| 3. Getting anxious about going to the hospital                | 0     | 1            | 2          | 3     | 4             |
| 4. Getting anxious when he/she has to have medical treatments | 0     | 1            | 2          | 3     | 4             |

In the past **ONE month**, how much of a **problem** has your teen had with ...

| <b>COGNITIVE PROBLEMS (<i>problems with...</i>)</b>       | <b>Never</b> | <b>Almost Never</b> | <b>Some-times</b> | <b>Often</b> | <b>Almost Always</b> |
|-----------------------------------------------------------|--------------|---------------------|-------------------|--------------|----------------------|
| 1. Figuring out what to do when something bothers him/her | 0            | 1                   | 2                 | 3            | 4                    |
| 2. Trouble solving math problems                          | 0            | 1                   | 2                 | 3            | 4                    |
| 3. Trouble writing school papers or reports               | 0            | 1                   | 2                 | 3            | 4                    |
| 4. Difficulty paying attention to things                  | 0            | 1                   | 2                 | 3            | 4                    |
| 5. Remembering what he/she reads                          | 0            | 1                   | 2                 | 3            | 4                    |

| <b>COMMUNICATION (<i>problems with...</i>)</b>      | <b>Never</b> | <b>Almost Never</b> | <b>Some-times</b> | <b>Often</b> | <b>Almost Always</b> |
|-----------------------------------------------------|--------------|---------------------|-------------------|--------------|----------------------|
| 1. Telling the doctors and nurses how he/she feels  | 0            | 1                   | 2                 | 3            | 4                    |
| 2. Asking the doctors or nurses questions           | 0            | 1                   | 2                 | 3            | 4                    |
| 3. Explaining his/her heart problem to other people | 0            | 1                   | 2                 | 3            | 4                    |

|             |
|-------------|
| ID# _____   |
| Date: _____ |

# PedsQL<sup>TM</sup>

## Cardiac Module

Version 3.0

### CHILD REPORT (ages 8-12)

#### DIRECTIONS

Children with heart conditions sometimes have special problems. Please tell us **how much of a problem** each one has been for you during the **past ONE month** by circling:

- 0 if it is **never** a problem
- 1 if it is **almost never** a problem
- 2 if it is **sometimes** a problem
- 3 if it is **often** a problem
- 4 if it is **almost always** a problem

There are no right or wrong answers.  
If you do not understand a question, please ask for help.



In the past **ONE** month, how much of a **problem** has this been for you...

| <b>HEART PROBLEMS AND TREATMENT</b><br><i>(problems with...)</i>       | Never | Almost<br>Never | Some-<br>times | Often | Almost<br>Always |
|------------------------------------------------------------------------|-------|-----------------|----------------|-------|------------------|
| 1. I get out of breath when I do sports activity or exercise           | 0     | 1               | 2              | 3     | 4                |
| 2. My chest hurts or feels tight when I do sports activity or exercise | 0     | 1               | 2              | 3     | 4                |
| 3. I catch colds easily                                                | 0     | 1               | 2              | 3     | 4                |
| 4. I feel my heart beating fast                                        | 0     | 1               | 2              | 3     | 4                |
| 5. My lips turn blue when I run                                        | 0     | 1               | 2              | 3     | 4                |
| 6. I wake up at night with trouble breathing                           | 0     | 1               | 2              | 3     | 4                |
| 7. I have to rest more than my friends                                 | 0     | 1               | 2              | 3     | 4                |

If you are currently taking heart medicine, please answer the following...  
Otherwise, please skip to "Perceived Physical Appearance".

| <b>TREATMENT II</b> <i>(problems with...)</i>    | Never | Almost<br>Never | Some-<br>times | Often | Almost<br>Always |
|--------------------------------------------------|-------|-----------------|----------------|-------|------------------|
| 1. I refuse to take my heart medicine            | 0     | 1               | 2              | 3     | 4                |
| 2. It is hard for me to take my heart medicine   | 0     | 1               | 2              | 3     | 4                |
| 3. I forget to take my heart medicine            | 0     | 1               | 2              | 3     | 4                |
| 4. My heart medicine makes me feel sick          | 0     | 1               | 2              | 3     | 4                |
| 5. I worry about how my medicines affect my body | 0     | 1               | 2              | 3     | 4                |

| <b>PERCEIVED PHYSICAL APPEARANCE</b><br><i>(problems with...)</i> | Never | Almost<br>Never | Some-<br>times | Often | Almost<br>Always |
|-------------------------------------------------------------------|-------|-----------------|----------------|-------|------------------|
| 1. I feel I am not good looking                                   | 0     | 1               | 2              | 3     | 4                |
| 2. I don't like other people to see my scars                      | 0     | 1               | 2              | 3     | 4                |
| 3. I am embarrassed when others see my body                       | 0     | 1               | 2              | 3     | 4                |

| <b>TREATMENT ANXIETY</b> <i>(problems with...)</i>     | Never | Almost<br>Never | Some-<br>times | Often | Almost<br>Always |
|--------------------------------------------------------|-------|-----------------|----------------|-------|------------------|
| 1. I get scared when I am waiting to see the doctor    | 0     | 1               | 2              | 3     | 4                |
| 2. I get scared when I have to go to the doctor        | 0     | 1               | 2              | 3     | 4                |
| 3. I get scared when I have to go to the hospital      | 0     | 1               | 2              | 3     | 4                |
| 4. I get scared when I have to have medical treatments | 0     | 1               | 2              | 3     | 4                |

In the past **ONE** month, how much of a **problem** has this been for you...

| <b>COGNITIVE PROBLEMS (problems with...)</b>                            | <b>Never</b> | <b>Almost Never</b> | <b>Sometimes</b> | <b>Often</b> | <b>Almost Always</b> |
|-------------------------------------------------------------------------|--------------|---------------------|------------------|--------------|----------------------|
| 1. It is hard for me to figure out what to do when something bothers me | 0            | 1                   | 2                | 3            | 4                    |
| 2. I have trouble solving math problems                                 | 0            | 1                   | 2                | 3            | 4                    |
| 3. I have trouble writing school papers or reports                      | 0            | 1                   | 2                | 3            | 4                    |
| 4. It is hard for me to pay attention to things                         | 0            | 1                   | 2                | 3            | 4                    |
| 5. It is hard for me to remember what I read                            | 0            | 1                   | 2                | 3            | 4                    |

| <b>COMMUNICATION (problems with...)</b>                          | <b>Never</b> | <b>Almost Never</b> | <b>Sometimes</b> | <b>Often</b> | <b>Almost Always</b> |
|------------------------------------------------------------------|--------------|---------------------|------------------|--------------|----------------------|
| 1. It is hard for me to tell the doctors and nurses how I feel   | 0            | 1                   | 2                | 3            | 4                    |
| 2. It is hard for me to ask the doctors and nurses questions     | 0            | 1                   | 2                | 3            | 4                    |
| 3. It is hard for me to explain my heart problem to other people | 0            | 1                   | 2                | 3            | 4                    |

ID# \_\_\_\_\_

Date: \_\_\_\_\_

# PedsQL<sup>TM</sup>

## Cardiac Module

Version 3.0

### PARENT REPORT for CHILDREN (ages 8-12)

#### DIRECTIONS

Children with heart conditions sometimes have special problems. On the following page is a list of things that might be a problem for **your child**. Please tell us **how much of a problem** each one has been for **your child** during the **past ONE month** by circling:

- 0 if it is **never** a problem
- 1 if it is **almost never** a problem
- 2 if it is **sometimes** a problem
- 3 if it is **often** a problem
- 4 if it is **almost always** a problem

There are no right or wrong answers.  
If you do not understand a question, please ask for help.

In the past **ONE month**, how much of a **problem** has your child had with ...

| <b>HEART PROBLEMS AND TREATMENT</b><br><i>(problems with...)</i>   | Never | Almost Never | Some-times | Often | Almost Always |
|--------------------------------------------------------------------|-------|--------------|------------|-------|---------------|
| 1. Getting out of breath while doing sports activity or exercise   | 0     | 1            | 2          | 3     | 4             |
| 2. Chest pain or tightness while doing sports activity or exercise | 0     | 1            | 2          | 3     | 4             |
| 3. Catching colds easily                                           | 0     | 1            | 2          | 3     | 4             |
| 4. Fast heartbeat                                                  | 0     | 1            | 2          | 3     | 4             |
| 5. His/her lips turning blue when running                          | 0     | 1            | 2          | 3     | 4             |
| 6. Waking up at night with trouble breathing                       | 0     | 1            | 2          | 3     | 4             |
| 7. Having to rest more than his/her friends                        | 0     | 1            | 2          | 3     | 4             |

If your child is currently taking heart medicine, please answer the following...  
Otherwise, please skip to "Perceived Physical Appearance".

| <b>TREATMENT II</b> <i>(problems with...)</i>     | Never | Almost Never | Some-times | Often | Almost Always |
|---------------------------------------------------|-------|--------------|------------|-------|---------------|
| 1. Refusing to take heart medicine                | 0     | 1            | 2          | 3     | 4             |
| 2. Difficulty taking heart medicine               | 0     | 1            | 2          | 3     | 4             |
| 3. Forgetting to take heart medicine              | 0     | 1            | 2          | 3     | 4             |
| 4. Heart medicine making him/her feel sick        | 0     | 1            | 2          | 3     | 4             |
| 5. Worry about side effects from his/her medicine | 0     | 1            | 2          | 3     | 4             |

| <b>PERCEIVED PHYSICAL APPEARANCE</b><br><i>(problems with...)</i> | Never | Almost Never | Some-times | Often | Almost Always |
|-------------------------------------------------------------------|-------|--------------|------------|-------|---------------|
| 1. Feeling that he/she is not good looking                        | 0     | 1            | 2          | 3     | 4             |
| 2. Not liking other people to see his/her scars                   | 0     | 1            | 2          | 3     | 4             |
| 3. Being embarrassed about others seeing his/her body             | 0     | 1            | 2          | 3     | 4             |

| <b>TREATMENT ANXIETY</b> <i>(problems with...)</i>            | Never | Almost Never | Some-times | Often | Almost Always |
|---------------------------------------------------------------|-------|--------------|------------|-------|---------------|
| 1. Getting anxious when waiting to see the doctor             | 0     | 1            | 2          | 3     | 4             |
| 2. Getting anxious about going to the doctor                  | 0     | 1            | 2          | 3     | 4             |
| 3. Getting anxious about going to the hospital                | 0     | 1            | 2          | 3     | 4             |
| 4. Getting anxious when he/she has to have medical treatments | 0     | 1            | 2          | 3     | 4             |

In the past **ONE month**, how much of a **problem** has your child had with ...

| <b>COGNITIVE PROBLEMS (problems with...)</b>              | <b>Never</b> | <b>Almost Never</b> | <b>Some-times</b> | <b>Often</b> | <b>Almost Always</b> |
|-----------------------------------------------------------|--------------|---------------------|-------------------|--------------|----------------------|
| 1. Figuring out what to do when something bothers him/her | 0            | 1                   | 2                 | 3            | 4                    |
| 2. Trouble solving math problems                          | 0            | 1                   | 2                 | 3            | 4                    |
| 3. Trouble writing school papers or reports               | 0            | 1                   | 2                 | 3            | 4                    |
| 4. Difficulty paying attention to things                  | 0            | 1                   | 2                 | 3            | 4                    |
| 5. Remembering what he/she reads                          | 0            | 1                   | 2                 | 3            | 4                    |

| <b>COMMUNICATION (problems with...)</b>             | <b>Never</b> | <b>Almost Never</b> | <b>Some-times</b> | <b>Often</b> | <b>Almost Always</b> |
|-----------------------------------------------------|--------------|---------------------|-------------------|--------------|----------------------|
| 1. Telling the doctors and nurses how he/she feels  | 0            | 1                   | 2                 | 3            | 4                    |
| 2. Asking the doctors or nurses questions           | 0            | 1                   | 2                 | 3            | 4                    |
| 3. Explaining his/her heart problem to other people | 0            | 1                   | 2                 | 3            | 4                    |

|             |
|-------------|
| ID# _____   |
| Date: _____ |

# PedsQL™

## Cardiac Module

Version 3.0

### YOUNG CHILD REPORT (ages 5-7)

Instructions for interviewer:

***I am going to ask you some questions about things that might be a problem for some children. I want to know how much of a problem any of these things might be for you.***

Show the child the template and point to the responses as you read.

***If it is not at all a problem for you, point to the smiling face***

***If it is sometimes a problem for you, point to the middle face***

***If it is a problem for you a lot, point to the frowning face***

***I will read each question. Point to the pictures to show me how much of a problem it is for you. Let's try a practice one first.***

|                                         | Not at all                                                                          | Sometimes                                                                             | A lot                                                                                 |
|-----------------------------------------|-------------------------------------------------------------------------------------|---------------------------------------------------------------------------------------|---------------------------------------------------------------------------------------|
| Is it hard for you to snap your fingers |  |  |  |

Ask the child to demonstrate snapping his or her fingers to determine whether or not the question was answered correctly. Repeat the question if the child demonstrates a response that is different from his or her action.

**Think about how you have been doing for the last few weeks. Please listen carefully to each sentence and tell me how much of a problem this is for you.**

After reading the item, gesture to the template. If the child hesitates or does not seem to understand how to answer, read the response options while pointing at the faces.

| <b>HEART PROBLEMS AND TREATMENT</b><br><i>(problems with...)</i>         | <b>Not at all</b> | <b>Some-times</b> | <b>A lot</b> |
|--------------------------------------------------------------------------|-------------------|-------------------|--------------|
| 1. Is it hard for you to breathe when you do sports activity or exercise | 0                 | 2                 | 4            |
| 2. Does your chest hurt when you do sports activity or exercise          | 0                 | 2                 | 4            |
| 3. Do you catch colds more than other kids                               | 0                 | 2                 | 4            |
| 4. Do you feel your heart beating fast                                   | 0                 | 2                 | 4            |
| 5. Do others tell you that your lips turn blue when you run              | 0                 | 2                 | 4            |
| 6. Do you wake up at night with trouble breathing                        | 0                 | 2                 | 4            |
| 7. Do you have to rest more than your friends                            | 0                 | 2                 | 4            |

**If you are currently taking heart medicine, please answer the following... Otherwise, please skip to “Perceived Physical Appearance”.**

| <b>TREATMENT II</b> <i>(problems with...)</i>         | <b>Not at all</b> | <b>Some-times</b> | <b>A lot</b> |
|-------------------------------------------------------|-------------------|-------------------|--------------|
| 1. Do you say no to taking your heart medicine        | 0                 | 2                 | 4            |
| 2. Do you have a hard time taking your heart medicine | 0                 | 2                 | 4            |
| 3. Does your heart medicine make you feel sick        | 0                 | 2                 | 4            |

| <b>PERCEIVED PHYSICAL APPEARANCE</b> <i>(problems with...)</i> | <b>Not at all</b> | <b>Some-times</b> | <b>A lot</b> |
|----------------------------------------------------------------|-------------------|-------------------|--------------|
| 1. Do you feel you don't look good                             | 0                 | 2                 | 4            |
| 2. Do you not like other people to see your scars              | 0                 | 2                 | 4            |
| 3. Do other kids tease you when they see your scars            | 0                 | 2                 | 4            |

| <b>TREATMENT ANXIETY</b> <i>(problems with...)</i>          | <b>Not at all</b> | <b>Some-times</b> | <b>A lot</b> |
|-------------------------------------------------------------|-------------------|-------------------|--------------|
| 1. Do you get scared when you are waiting to see the doctor | 0                 | 2                 | 4            |
| 2. Do you get scared when you have to go to the doctor      | 0                 | 2                 | 4            |
| 3. Do you get scared when you have to go to the hospital    | 0                 | 2                 | 4            |
| 4. Do you get scared when you have to have heart tests      | 0                 | 2                 | 4            |

**Think about how you have been doing for the last few weeks. Please listen carefully to each sentence and tell me how much of a problem this is for you.**

| <b>COGNITIVE PROBLEMS (problems with...)</b>                        | <b>Not at all</b> | <b>Some-times</b> | <b>A lot</b> |
|---------------------------------------------------------------------|-------------------|-------------------|--------------|
| 1. Is it hard for you to know what to do when something bothers you | 0                 | 2                 | 4            |
| 2. Do you have trouble with numbers or math worksheets              | 0                 | 2                 | 4            |
| 3. Do you have trouble writing letters or words                     | 0                 | 2                 | 4            |
| 4. Is it hard for you to listen to the teacher                      | 0                 | 2                 | 4            |
| 5. Is it hard for you to remember what is read to you               | 0                 | 2                 | 4            |

| <b>COMMUNICATION (problems with...)</b>                             | <b>Not at all</b> | <b>Some-times</b> | <b>A lot</b> |
|---------------------------------------------------------------------|-------------------|-------------------|--------------|
| 1. Is it hard for you to tell the doctors and nurses how you feel   | 0                 | 2                 | 4            |
| 2. Is it hard for you to ask the doctors and nurses questions       | 0                 | 2                 | 4            |
| 3. Is it hard for you to explain your heart problem to other people | 0                 | 2                 | 4            |



# How much of a problem is this for you?

Not at all

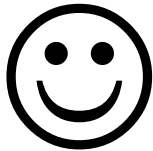

Sometimes

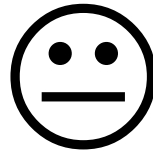

A lot

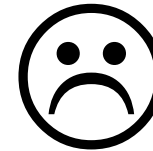

ID# \_\_\_\_\_

Date: \_\_\_\_\_

# PedsQL<sup>TM</sup>

## Cardiac Module

Version 3.0

### PARENT REPORT for YOUNG CHILDREN (ages 5-7)

#### DIRECTIONS

Children with heart conditions sometimes have special problems. On the following page is a list of things that might be a problem for **your child**. Please tell us **how much of a problem** each one has been for **your child** during the **past ONE month** by circling:

- 0** if it is **never** a problem
- 1** if it is **almost never** a problem
- 2** if it is **sometimes** a problem
- 3** if it is **often** a problem
- 4** if it is **almost always** a problem

There are no right or wrong answers.  
If you do not understand a question, please ask for help.

In the past **ONE month**, how much of a **problem** has your child had with ...

| <b>HEART PROBLEMS AND TREATMENT</b><br><i>(problems with...)</i>   | Never | Almost Never | Some-times | Often | Almost Always |
|--------------------------------------------------------------------|-------|--------------|------------|-------|---------------|
| 1. Getting out of breath while doing sports activity or exercise   | 0     | 1            | 2          | 3     | 4             |
| 2. Chest pain or tightness while doing sports activity or exercise | 0     | 1            | 2          | 3     | 4             |
| 3. Catching colds easily                                           | 0     | 1            | 2          | 3     | 4             |
| 4. Fast heartbeat                                                  | 0     | 1            | 2          | 3     | 4             |
| 5. His/her lips turning blue when running                          | 0     | 1            | 2          | 3     | 4             |
| 6. Waking up at night with trouble breathing                       | 0     | 1            | 2          | 3     | 4             |
| 7. Having to rest more than his/her friends                        | 0     | 1            | 2          | 3     | 4             |

If your child is currently taking heart medicine, please answer the following...  
Otherwise, please skip to "Perceived Physical Appearance".

| <b>TREATMENT II</b> <i>(problems with...)</i> | Never | Almost Never | Some-times | Often | Almost Always |
|-----------------------------------------------|-------|--------------|------------|-------|---------------|
| 1. Refusing to take heart medicine            | 0     | 1            | 2          | 3     | 4             |
| 2. Difficulty taking heart medicine           | 0     | 1            | 2          | 3     | 4             |
| 3. Heart medicine making him/her feel sick    | 0     | 1            | 2          | 3     | 4             |

| <b>PERCEIVED PHYSICAL APPEARANCE</b><br><i>(problems with...)</i> | Never | Almost Never | Some-times | Often | Almost Always |
|-------------------------------------------------------------------|-------|--------------|------------|-------|---------------|
| 1. Feeling that he/she is not good looking                        | 0     | 1            | 2          | 3     | 4             |
| 2. Not liking other people to see his/her scars                   | 0     | 1            | 2          | 3     | 4             |
| 3. Getting teased when other kids see his/her scars               | 0     | 1            | 2          | 3     | 4             |

| <b>TREATMENT ANXIETY</b> <i>(problems with...)</i>            | Never | Almost Never | Some-times | Often | Almost Always |
|---------------------------------------------------------------|-------|--------------|------------|-------|---------------|
| 1. Getting anxious when waiting to see the doctor             | 0     | 1            | 2          | 3     | 4             |
| 2. Getting anxious about going to the doctor                  | 0     | 1            | 2          | 3     | 4             |
| 3. Getting anxious about going to the hospital                | 0     | 1            | 2          | 3     | 4             |
| 4. Getting anxious when he/she has to have medical treatments | 0     | 1            | 2          | 3     | 4             |

In the past **ONE month**, how much of a **problem** has your child had with ...

| <b>COGNITIVE PROBLEMS (problems with...)</b>              | <b>Never</b> | <b>Almost Never</b> | <b>Some-times</b> | <b>Often</b> | <b>Almost Always</b> |
|-----------------------------------------------------------|--------------|---------------------|-------------------|--------------|----------------------|
| 1. Figuring out what to do when something bothers him/her | 0            | 1                   | 2                 | 3            | 4                    |
| 2. Trouble with numbers or math worksheets                | 0            | 1                   | 2                 | 3            | 4                    |
| 3. Trouble writing letters or words                       | 0            | 1                   | 2                 | 3            | 4                    |
| 4. Difficulty paying attention to the teacher             | 0            | 1                   | 2                 | 3            | 4                    |
| 5. Remembering what is read to him/her                    | 0            | 1                   | 2                 | 3            | 4                    |

| <b>COMMUNICATION (problems with...)</b>             | <b>Never</b> | <b>Almost Never</b> | <b>Some-times</b> | <b>Often</b> | <b>Almost Always</b> |
|-----------------------------------------------------|--------------|---------------------|-------------------|--------------|----------------------|
| 1. Telling the doctors and nurses how he/she feels  | 0            | 1                   | 2                 | 3            | 4                    |
| 2. Asking the doctors or nurses questions           | 0            | 1                   | 2                 | 3            | 4                    |
| 3. Explaining his/her heart problem to other people | 0            | 1                   | 2                 | 3            | 4                    |

ID# \_\_\_\_\_

Date: \_\_\_\_\_

# PedsQL<sup>TM</sup>

## Cardiac Module

Version 3.0

### PARENT REPORT for TODDLERS (ages 2-4)

#### DIRECTIONS

Children with heart conditions sometimes have special problems. On the following page is a list of things that might be a problem for **your child**. Please tell us **how much of a problem** each one has been for **your child** during the **past ONE month** by circling:

- 0** if it is **never** a problem
- 1** if it is **almost never** a problem
- 2** if it is **sometimes** a problem
- 3** if it is **often** a problem
- 4** if it is **almost always** a problem

There are no right or wrong answers.  
If you do not understand a question, please ask for help.

In the past **ONE month**, how much of a **problem** has your child had with ...

| <b>HEART PROBLEMS AND TREATMENT</b><br><i>(problems with...)</i> | Never | Almost Never | Some-times | Often | Almost Always |
|------------------------------------------------------------------|-------|--------------|------------|-------|---------------|
| 1. Getting out of breath while doing active play or exercise     | 0     | 1            | 2          | 3     | 4             |
| 2. Chest pain or tightness while doing active play or exercise   | 0     | 1            | 2          | 3     | 4             |
| 3. Catching colds easily                                         | 0     | 1            | 2          | 3     | 4             |
| 4. Fast heartbeat                                                | 0     | 1            | 2          | 3     | 4             |
| 5. His/her lips turning blue when running                        | 0     | 1            | 2          | 3     | 4             |
| 6. Waking up at night with trouble breathing                     | 0     | 1            | 2          | 3     | 4             |
| 7. Having to rest more than his/her friends                      | 0     | 1            | 2          | 3     | 4             |

If your child is currently taking heart medicine, please answer the following...

Otherwise, please skip to "Perceived Physical Appearance".

| <b>TREATMENT II</b> <i>(problems with...)</i> | Never | Almost Never | Some-times | Often | Almost Always |
|-----------------------------------------------|-------|--------------|------------|-------|---------------|
| 1. Refusing to take heart medicine            | 0     | 1            | 2          | 3     | 4             |
| 2. Difficulty taking heart medicine           | 0     | 1            | 2          | 3     | 4             |
| 3. Heart medicine making him/her feel sick    | 0     | 1            | 2          | 3     | 4             |

| <b>PERCEIVED PHYSICAL APPEARANCE</b><br><i>(problems with...)</i> | Never | Almost Never | Some-times | Often | Almost Always |
|-------------------------------------------------------------------|-------|--------------|------------|-------|---------------|
| 1. Feeling that he/she is not good looking                        | 0     | 1            | 2          | 3     | 4             |
| 2. Not liking other people to see his/her scars                   | 0     | 1            | 2          | 3     | 4             |
| 3. Being embarrassed about others seeing his/her body             | 0     | 1            | 2          | 3     | 4             |

| <b>TREATMENT ANXIETY</b> <i>(problems with...)</i>            | Never | Almost Never | Some-times | Often | Almost Always |
|---------------------------------------------------------------|-------|--------------|------------|-------|---------------|
| 1. Getting anxious when waiting to see the doctor             | 0     | 1            | 2          | 3     | 4             |
| 2. Getting anxious about going to the doctor                  | 0     | 1            | 2          | 3     | 4             |
| 3. Getting anxious about going to the hospital                | 0     | 1            | 2          | 3     | 4             |
| 4. Getting anxious when he/she has to have medical treatments | 0     | 1            | 2          | 3     | 4             |

In the past **ONE month**, how much of a **problem** has your child had with ...

| <b>COGNITIVE PROBLEMS (<i>problems with...</i>)</b>       | <b>Never</b> | <b>Almost<br/>Never</b> | <b>Some-<br/>times</b> | <b>Often</b> | <b>Almost<br/>Always</b> |
|-----------------------------------------------------------|--------------|-------------------------|------------------------|--------------|--------------------------|
| 1. Figuring out what to do when something bothers him/her | 0            | 1                       | 2                      | 3            | 4                        |
| 2. Difficulty paying attention to things                  | 0            | 1                       | 2                      | 3            | 4                        |
| 3. Remembering what is read to him/her                    | 0            | 1                       | 2                      | 3            | 4                        |

| <b>COMMUNICATION (<i>problems with...</i>)</b>      | <b>Never</b> | <b>Almost<br/>Never</b> | <b>Some-<br/>times</b> | <b>Often</b> | <b>Almost<br/>Always</b> |
|-----------------------------------------------------|--------------|-------------------------|------------------------|--------------|--------------------------|
| 1. Telling the doctors and nurses how he/she feels  | 0            | 1                       | 2                      | 3            | 4                        |
| 2. Asking the doctors or nurses questions           | 0            | 1                       | 2                      | 3            | 4                        |
| 3. Explaining his/her heart problem to other people | 0            | 1                       | 2                      | 3            | 4                        |
